# Supplementary material
Source: Springer Nature journal article supplement (https://www.springermedizin.de/resource/supplementary/12998_2012_68_MOESM1_ESM.pdf/9680148)
Supplement: MOESM1 [file 9680148]

Baseline: 405 patients

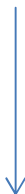

1 Month Data: 340 patients.  
32 missed calls. 12 not yet time to phone.

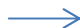

21 patients no longer wish to participate

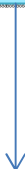

3 Month Data: 313 patients.  
30 missed calls. 40 not yet time to phone.

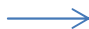

1 patient 3 consecutive missed calls

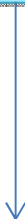

6 Month Data: 297 patients.  
16 missed calls. 70 not yet time to phone.
